# Supplementary material for: Evaluation of telepsychiatry during the COVID-19 pandemic across service users, carers and clinicians: an international mixed-methods study
Source: PubMed Central journal article supplement — BMJ Ment Health. 2023 Aug 11;26(1):e300646. doi: 10.1136/bmjment-2022-300646 (PMC10577786; doi:10.1136/bmjment-2022-300646), 2023-08-11
Supplement: bmjment-2022-300646supp001.pdf [file bmjment-2022-300646supp001.pdf]

9/27/22, 6:07 PM

Survey of mental health service users' experience of digital appointments

# Survey of mental health service users' experience of digital appointments

This survey is for people who are using mental health services.

We want to know about your views and experiences of telephone or video appointments with your mental health team.

Your answers will give us valuable feedback on people's experiences and preferences for how services could be delivered in the future.

Thank you for taking part.

\* Required

## Part 1: Details about you

1. Which NHS Trust are you currently being seen by for your mental health? \*

- Oxford Health (covering Oxfordshire, Buckinghamshire, Bath & NE Somerset / Swindon / Wiltshire)
- Southern Health (covering Hampshire)
- Other

9/27/22, 6:07 PM

Survey of mental health service users' experience of digital appointments

2. Which Oxford Health service or team are supporting you with your mental health?

(If more than one team which one have you seen most of in the last year?) \*

- Adult Mental Health (including Perinatal services)
- Older Adult Mental Health Services (excluding Memory Assessment Clinics)
- Memory Assessment Clinic
- Child and Adolescent Mental Health Services (CAMHS) including inpatient services
- Other (including Forensic Services, Learning Disability services, Eating Disorders, Early Intervention in Psychosis (EIP), Home Treatment Team/CRISIS Response and other specialist services)

3. Which Southern Health service or team are supporting you with your mental health?

(If more than one team which one have you seen most of in the last year?) \*

- Adult Mental Health (including Perinatal services)
- Older People's Mental Health Services (excluding Memory Services)
- Memory Services
- Child and Adolescent Mental Health Services (CAMHS) including inpatient services
- Other (including Secure Forensic Services, Learning Disability services and autistic diagnostic services, Eating Disorders, Liaison Psychiatry; Early Intervention in Psychosis (EIP) Services, AMH-Home Treatment Team/CRISIS and other specialist services)

9/27/22, 6:07 PM

Survey of mental health service users' experience of digital appointments

4. Which health service or team are supporting you with your mental health?  
(If more than one team which one have you seen most of in the last year?) \*

- Adult Mental Health (including Perinatal services)
- Older People's Mental Health Services (excluding Memory Services)
- Memory Services
- Child and Adolescent Mental Health Services (CAMHS)
- Other (including Secure Forensic Services, Learning Disability services and autistic diagnostic services, Eating Disorders, Liaison Psychiatry; Early Intervention in Psychosis (EIP) Services, AMH-Home Treatment Team/CRISIS and other specialist services)

5. Which age group are you in? \*

- 16-17
- 18-24
- 25-34
- 35-44
- 45-54
- 55-64
- 65-74
- 75+
- Prefer not to say

9/27/22, 6:07 PM

Survey of mental health service users' experience of digital appointments

## 6. What is your gender? \*

- Male
- Female
- Non-binary
- Prefer not to say
- Other

9/27/22, 6:07 PM

Survey of mental health service users' experience of digital appointments

## 7. What is your ethnicity? \*

- Asian/Asian British - Bangladeshi
- Asian/Asian British - Indian
- Asian/Asian British - Pakistani
- Asian - Other background
- Chinese/Chinese British
- Black/Black British - African
- Black/Black British - Caribbean
- Black - Other background
- White and Asian
- White and Black African
- White and Black Caribbean
- White - English, Scottish, Welsh, Northern Irish
- White - Other background
- Other Mixed background
- Other Ethnic group
- Prefer not to say

9/27/22, 6:07 PM

Survey of mental health service users' experience of digital appointments

## 8. What would you say is your main mental health problem? \*

- Mood Disorder (such as Depression or Bipolar Affective Disorder)
- Anxiety Disorder (such as Panic Disorder)
- Post-Traumatic Stress Disorder
- Obsessive Compulsive Disorder
- Psychotic Disorder (such as Schizophrenia or Schizoaffective Disorder)
- Alcohol Use Disorder
- Substance Use Disorder (not including alcohol)
- Personality Disorder (such as Emotionally Unstable Personality Disorder)
- Memory problems
- ADHD (Attention Deficit Hyperactivity Disorder)
- Eating Disorder (such as anorexia or bulimia nervosa)
- Prefer not to say
- Other

9/27/22, 6:07 PM

Survey of mental health service users' experience of digital appointments

## Part 2: Use of telephone & video appointments for your mental health care since March 2020

Your mental health team includes all the staff who are providing you with mental health care and treatment. This could include a care co-ordinator, occupational therapist, community psychiatric nurse, social worker, psychiatrist or psychologist.

9. Around how many telephone or video appointments have you had with your mental health team since March 2020? \*

- None
- 1
- 2-5
- 6-10
- More than 10

10. Has there been a change in the use of telephone or video appointments in your mental health care since March 2020? \*

- Telephone or video has been used more often
- Telephone or video has been used less often
- No change
- I did not have mental health care before March 2020

9/27/22, 6:07 PM

Survey of mental health service users' experience of digital appointments

## 11. How was the type of appointment you had most often chosen? \*

Please tick one option

- My choice (and/or my carers)
- The mental health team's choice
- The decision was made jointly by me/my carer and the team

## 12. Which type of appointment works best for you overall? \*

Drag and drop the options so most preferred is at the top and least preferred at the bottom

|                                                         |
|---------------------------------------------------------|
| In person with face covering (e.g. mask and / or visor) |
| In person without face covering                         |
| Telephone                                               |
| Video                                                   |

## 13. In general, how would you describe your experience with telephone appointments for your mental health care? \*

- Excellent
- Good
- Fair
- Poor
- Very poor
- I have not had a telephone appointment for my mental health care



9/27/22, 6:07 PM

Survey of mental health service users' experience of digital appointments

14. What was positive about your experience with telephone appointments? \*

(please tick all that apply)

- I felt understood
- It was easy to understand what was being said to me
- It was easy to hear what was being said to me
- It was convenient
- I felt comfortable
- I was confident about confidentiality
- It was easy to build a relationship with the mental health worker/s
- It was easy to talk about sensitive topics
- It was easy to involve my carer and others if needed
- I felt that there was enough time
- It felt safe
- It was easy to use (technically)
- None of the above
- Other

9/27/22, 6:07 PM

Survey of mental health service users' experience of digital appointments

15. What was negative about your experience with telephone appointments? \*

Please tick all that apply

- I felt less understood
- It was difficult to understand what was being said to me
- It was difficult to hear what was being said to me
- It was less convenient
- I felt less comfortable
- I was not confident about confidentiality
- It was difficult to build a relationship with the mental health worker/s
- It was difficult to talk about sensitive topics
- It was hard to involve my carers and others if needed
- I felt that there was too little time
- It felt unsafe
- It was difficult to use (technically)
- None of the above
- Other

9/27/22, 6:07 PM

Survey of mental health service users' experience of digital appointments

16. In general, how would you describe your experience with video appointments for your mental health care? \*

- Excellent
- Good
- Fair
- Poor
- Very poor
- I have not had a video appointment for my mental health care

9/27/22, 6:07 PM

Survey of mental health service users' experience of digital appointments

## 17. What was positive about your experience with video appointments? \*

(please tick all that apply)

- I felt understood
- It was easy to understand what was being said to me
- It was easy to hear what was being said to me
- It was convenient
- I felt comfortable
- I was confident about confidentiality
- It was easy to build a relationship with the mental health worker/s
- It was easy to talk about sensitive topics
- It was easy to involve my carer and others if needed
- I felt that there was enough time
- It felt safe
- It was easy to use (technically)
- None of the above
- Other

9/27/22, 6:07 PM

Survey of mental health service users' experience of digital appointments

## 18. What was negative about your experience with video appointments? \*

Please tick all that apply

- I felt less understood
- It was difficult to understand what was being said to me
- It was difficult to hear what was being said to me
- It was less convenient
- I felt less comfortable
- I was not confident about confidentiality
- It was difficult to build a relationship with the mental health worker/s
- It was difficult to talk about sensitive topics
- It was hard to involve my carers and others if needed
- I felt that there was too little time
- It felt unsafe
- It was difficult to use (technically)
- None of the above
- Other

## 19. Has your experience of telephone or video appointments changed over time? \*

- Improved
- Got worse
- Stayed the same
- I have not had more than one consultation by telephone or video

9/27/22, 6:07 PM

Survey of mental health service users' experience of digital appointments

20. How much would you like to have telephone or video appointments for your mental healthcare in the future? \*

For example after COVID-19 restrictions are lifted

- Not at all
- Less than half of all appointments (but more than none)
- About half
- More than half (but less than all)
- All (I would like all appointments to be via telephone or video)

21. Have you had any training on how to have a telephone or video appointment? \*

- Yes
- No

22. Would you like to have training on how to have telephone or video appointments? \*

- Definitely
- Probably
- Maybe
- Definitely not

---

This content is neither created nor endorsed by Microsoft. The data you submit will be sent to the form owner.

 Microsoft Forms

9/27/22, 6:05 PM

Survey of carers' experience of digital appointments

# Survey of carers' experience of digital appointments

This survey is for people who are caring for people (all ages) who are using mental health services.

We want to know about your views and experiences of digital (e.g. telephone or video) appointments.

Your answers will give us valuable feedback on people's experiences and preferences for how services could be delivered in the future.

Thank you for taking part.

\* Required

## Part 1: Details about the person you care for

1. Which NHS Trust is supporting the person you care for with their mental health? \*

- Oxford Health (covering Oxfordshire, Buckinghamshire, Bath & NE Somerset / Swindon / Wiltshire)
- Southern Health (covering Hampshire)
- Other

9/27/22, 6:05 PM

Survey of carers' experience of digital appointments

2. Which Oxford Health service or team is supporting the person you care for?  
(If more than one team which one have you seen most of in the last year?) \*

- Adult Mental Health (including Perinatal services)
- Older Adult Mental Health Services (excluding Memory Assessment Clinics)
- Memory Assessment Clinic
- Child and Adolescent Mental Health Services (CAMHS) including inpatient services
- Other (including Forensic Services, Learning Disability services, Eating Disorders, Early Intervention in Psychosis (EIP), Home Treatment Team/CRISIS Response and other specialist services)

3. Which Southern Health service or team is supporting the person you care for?  
(If more than one team which one have you seen most of in the last year?) \*

- Adult Mental Health (including Perinatal services)
- Older People's Mental Health Services (excluding Memory Services)
- Memory Services
- Child and Adolescent Mental Health Services (CAMHS) including inpatient services
- Other (including Secure Forensic Services, Learning Disability services and autistic diagnostic services, Eating Disorders, Liaison Psychiatry; Early Intervention in Psychosis (EIP) Services, AMH-Home Treatment Team/CRISIS and other specialist services)



9/27/22, 6:05 PM

Survey of carers' experience of digital appointments

4. Which health service or team is supporting the person you care for?  
(If more than one team which one have you seen most of in the last year?) \*

- Adult Mental Health (including Perinatal services)
- Older People's Mental Health Services (excluding Memory Services)
- Memory Services
- Child and Adolescent Mental Health Services (CAMHS)
- Other (including Secure Forensic Services, Learning Disability services and autistic diagnostic services, Eating Disorders, Liaison Psychiatry; Early Intervention in Psychosis (EIP) Services, AMH-Home Treatment Team/CRISIS and other specialist services)
- ...

5. Which age group is the person you care for in? \*

- 12-15
- 16-17
- 18-24
- 25-34
- 35-44
- 45-54
- 55-64
- 65-74
- 75+
- Prefer not to say

9/27/22, 6:05 PM

Survey of carers' experience of digital appointments

6. What is the gender of the person you care for? \*

- Male
- Female
- Non-binary
- Prefer not to say
- Other

9/27/22, 6:05 PM

Survey of carers' experience of digital appointments

## 7. What is the ethnicity of the person you care for? \*

- Asian/Asian British - Bangladeshi
- Asian/Asian British - Indian
- Asian/Asian British - Pakistani
- Asian - Other background
- Chinese/Chinese British
- Black/Black British - African
- Black/Black British - Caribbean
- Black - Other background
- White and Asian
- White and Black African
- White and Black Caribbean
- White - English, Scottish, Welsh, Northern Irish
- White - Other background
- Other Mixed background
- Other Ethnic group
- Prefer not to say

9/27/22, 6:05 PM

Survey of carers' experience of digital appointments

8. What would you say is the main mental health problem of the person you care for? \*

- Mood Disorder (such as Depression or Bipolar Affective Disorder)
- Anxiety Disorder (such as Panic Disorder)
- Post-Traumatic Stress Disorder
- Obsessive Compulsive Disorder
- Psychotic Disorder (such as Schizophrenia or Schizoaffective Disorder)
- Alcohol Use Disorder
- Substance Use Disorder (not including alcohol)
- Personality Disorder (such as Emotionally Unstable Personality Disorder)
- Memory problems
- ADHD (Attention Deficit Hyperactivity Disorder)
- Eating Disorder (such as anorexia or bulimia nervosa)
- Prefer not to say
- Other

9/27/22, 6:05 PM

Survey of carers' experience of digital appointments

## Part 2: Use of telephone & video appointments for mental health care since March 2020

The mental health team includes all the staff who are providing mental health care and treatment. This could include a care co-ordinator, occupational therapist, community psychiatric nurse, social worker, psychiatrist or psychologist.

9. Around how many telephone or video appointments has the person you care for had with the mental health team since March 2020? \*

- None
- 1
- 2-5
- 6-10
- More than 10

10. Has there been a change in the use of telephone or video appointments since March 2020? \*

- Telephone or video has been used more often
- Telephone or video has been used less often
- No change
- The person I care for did not have mental health care before March 2020

11. How was the type of appointment used most often chosen? \*

Please tick one option

- The person and / or their carer's choice
- The mental health team's choice
- The decision was made jointly by the person / their carer and the team

9/27/22, 6:05 PM

Survey of carers' experience of digital appointments

## 12. In your opinion which type of appointment works best overall? \*

Drag and drop the options so most preferred is at the top and least preferred at the bottom

|                                                         |
|---------------------------------------------------------|
| In person with face covering (e.g. mask and / or visor) |
| In person without face covering                         |
| Telephone                                               |
| Video                                                   |

## 13. In general, how would you describe your experience of telephone appointments for mental health care? \*

- Excellent
- Good
- Fair
- Poor
- Very poor
- I have not taken part in a telephone appointment

9/27/22, 6:05 PM

Survey of carers' experience of digital appointments

14. What was positive about your experience with telephone appointments? \*

(please tick all that apply)

- The person I care for felt understood
- It was easy to understand what was being said
- It was easy to hear what was being said
- It was convenient
- The person I care for felt comfortable
- The person I care for felt confident about confidentiality
- It was easy to build a relationship with the mental health worker/s
- It was easy to talk about sensitive topics
- It was easy to involve other people if needed
- It felt like there was enough time
- It felt safe
- It was easy to use (technically)
- None of the above
- Other

9/27/22, 6:05 PM

Survey of carers' experience of digital appointments

15. What was negative about your experience with telephone appointments? \*

Please tick all that apply

- The person I care for felt less understood
- It was difficult to understand what was being said
- It was difficult to hear what was being said
- It was less convenient
- The person I care for felt less comfortable
- The person I care for was not confident about confidentiality
- It was difficult to build a relationship with the mental health worker/s
- It was difficult to talk about sensitive topics
- It was hard to involve other people if needed
- It felt like there was too little time
- It felt unsafe
- It was difficult to use (technically)
- None of the above
- Other



9/27/22, 6:05 PM

Survey of carers' experience of digital appointments

16. In general, how would you describe your experience of video appointments for mental health care? \*

- Excellent
- Good
- Fair
- Poor
- Very poor
- I have not taken part in a video appointment

9/27/22, 6:05 PM

Survey of carers' experience of digital appointments

## 17. What was positive about your experience with video appointments? \*

(please tick all that apply)

- The person I care for felt understood
- It was easy to understand what was being said
- It was easy to hear what was being said
- It was convenient
- The person I care for felt comfortable
- The person I care for felt confident about confidentiality
- It was easy to build a relationship with the mental health worker/s
- It was easy to talk about sensitive topics
- It was easy to involve other people if needed
- It felt like there was enough time
- It felt safe
- It was easy to use (technically)
- None of the above
- Other

9/27/22, 6:05 PM

Survey of carers' experience of digital appointments

## 18. What was negative about your experience with video appointments? \*

Please tick all that apply

- The person I care for felt less understood
- It was difficult to understand what was being said
- It was difficult to hear what was being said
- It was less convenient
- The person I care for felt less comfortable
- The person I care for was not confident about confidentiality
- It was difficult to build a relationship with the mental health worker/s
- It was difficult to talk about sensitive topics
- It was hard to involve other people if needed
- It felt like there was too little time
- It felt unsafe
- It was difficult to use (technically)
- None of the above
- Other

## 19. Has your experience of telephone or video appointments changed over time? \*

- Improved
- Got worse
- Stayed the same
- I have not taken part in more than one consultation by telephone or video

9/27/22, 6:05 PM

Survey of carers' experience of digital appointments

20. Would you like to have telephone or video appointments for the person you care for's mental healthcare in the future? \*

For example after COVID-19 restrictions are lifted

- Not at all
- Less than half of all appointments (but more than none)
- About half
- More than half (but less than all)
- All (I would like all appointments to be via telephone or video)

21. Have you had any training on how to have a telephone or video appointment? \*

- Yes
- No

22. Would you like to have training on how to have telephone or video appointments? \*

- Definitely
- Probably
- Maybe
- Definitely not

---

This content is neither created nor endorsed by Microsoft. The data you submit will be sent to the form owner.

 Microsoft Forms

9/27/22, 6:05 PM

Survey of clinicians experience of digital appointments

# Survey of clinicians experience of digital appointments

Thank you for taking part in this survey

Please note: 'Telepsychiatry' refers to all remote consultations including telephone and video consultations.

\* Required

## Part 1: Details about you

1. Which NHS Trust are you currently working for? \*

- Oxford Health (covering Oxfordshire, Buckinghamshire, Bath & NE Somerset / Swindon / Wiltshire)
- Southern Health (covering Hampshire)

9/27/22, 6:05 PM

Survey of clinicians experience of digital appointments

2. In which Oxford Health service do you work for the majority (more than 50%) of your clinical time? \*

- Adult Mental Health (including Perinatal services)
- Older Adult Mental Health Services (excluding Memory Assessment Clinics)
- Memory Assessment Clinic
- Child and Adolescent Mental Health Services (CAMHS) including inpatient services
- Other (including Forensic Services, Learning Disability services, Eating Disorders, Early Intervention in Psychosis (EIP), Home Treatment Team/CRISIS Response and other specialist services)

3. In which Southern Health service do you work for the majority (more than 50%) of your clinical time? \*

- Adult Mental Health (including Perinatal services)
- Older People's Mental Health Services (excluding Memory Services)
- Memory Services
- Child and Adolescent Mental Health Services (CAMHS) including inpatient services
- Other (including Secure Forensic Services, Learning Disability services and autistic diagnostic services, Eating Disorders, Liaison Psychiatry; Early Intervention in Psychosis (EIP) Services, AMH-Home Treatment Team/CRISIS and other specialist services)

9/27/22, 6:05 PM

Survey of clinicians experience of digital appointments

## 4. What is your professional background? \*

- Nursing
- Social work
- Occupational therapy
- Medical
- Psychology
- Physiotherapy
- Other

## 5. Which age group are you in? \*

- 18-24
- 25-34
- 35-44
- 45-54
- 55-64
- 65-74
- 74+
- Prefer not to say

9/27/22, 6:05 PM

Survey of clinicians experience of digital appointments

## 6. What is your gender? \*

- Male
- Female
- Non-binary
- Prefer not to say
- Other



9/27/22, 6:05 PM

Survey of clinicians experience of digital appointments

## 7. What is your ethnicity? \*

- Asian/Asian British - Bangladeshi
- Asian/Asian British - Indian
- Asian/Asian British - Pakistani
- Asian - Other background
- Chinese/Chinese British
- Black/Black British - African
- Black/Black British - Caribbean
- Black - Other background
- White and Asian
- White and Black African
- White and Black Caribbean
- White - English, Scottish, Welsh, Northern Irish
- White - Other background
- Other Mixed background
- Other Ethnic group
- Prefer not to say

9/27/22, 6:05 PM

Survey of clinicians experience of digital appointments

## Part 2: Use of telephone or video consultations

8. How has your use of telephone or video consultations changed since the start of the Covid-19 pandemic (March 2020)? \*

- I use telepsychiatry more than previously
- I use telepsychiatry the same as previously
- I use telepsychiatry less than previously

9. Please rank the frequency of use of the following consultation types, since March 2020. \*

Please drag and drop options to rank - 1 being most frequent to 3 being least frequent

|           |
|-----------|
| In person |
| Telephone |
| Video     |

10. In general, which of the following factors has been most influential on the type of consultation given by you, since March 2020? (please tick one option) \*

- Patient / carer
- Clinical team (me and the team directly involved in patient care)
- A joint decision between the clinical team and the patient / carer
- Service/Trust (directive from outside the clinical team)

9/27/22, 6:05 PM

Survey of clinicians experience of digital appointments

11. How would you rank the following consultation types in providing mental healthcare IN GENERAL? (top preference=1 etc). \*

Please drag and drop options to rank - 1 being most preferred to 4 being least preferred

|                                                  |
|--------------------------------------------------|
| In person with face covering (e.g. masks/visors) |
| In person without face covering                  |
| Telephone                                        |
| Video                                            |

12. Which mental health problems do you think are MOST suitable for telephone or video consultations? (please tick all that apply) \*

- Mood disorders (such as Depression or Bipolar Affective Disorder)
- Anxiety Disorders (such as Panic disorder)
- Post-Traumatic Stress Disorder
- Obsessive Compulsive Disorder
- Psychotic Disorders (such as Schizophrenia or Schizoaffective disorder)
- Alcohol Use Disorder
- Substance Use Disorders (excluding alcohol)
- Personality Disorders (such as Emotionally Unstable Personality Disorder)
- Memory problems
- ADHD (Attention Deficit Hyperactivity Disorder)
- Suicidal or self-harming behaviour
- Acutely unwell or agitated behaviour
- Other

9/27/22, 6:05 PM

Survey of clinicians experience of digital appointments

13. Which mental health problems do you think are LEAST suitable for telephone or video consultations? (please tick all that apply) \*

- Mood disorders (such as Depression or Bipolar Affective Disorder)
- Anxiety Disorders (such as Panic disorder)
- Post-Traumatic Stress Disorder
- Obsessive Compulsive Disorder
- Psychotic Disorders (such as Schizophrenia or Schizoaffective disorder)
- Alcohol Use Disorder
- Substance Use Disorders (excluding alcohol)
- Personality Disorders (such as Emotionally Unstable Personality Disorder)
- Memory problems
- ADHD (Attention Deficit Hyperactivity Disorder)
- Suicidal or self-harming behaviour
- Acutely unwell or agitated behaviour
- Other

14. In general, how would you describe your experience with telephone consultations for delivering mental health care? \*

- Excellent
- Good
- Fair
- Poor
- Very Poor
- N/A (I have not used telephone consultations)

9/27/22, 6:05 PM

Survey of clinicians experience of digital appointments

15. Please indicate what has contributed positively to your experience in delivering telephone consultations (please tick all that apply) \*

- It was easy to establish rapport
- I felt confident about delivering this type of consultation
- I felt supported in delivering this type of consultation
- I was confident about confidentiality
- It was easy to talk about sensitive topics
- It was effective in allowing me to assess risk
- It was effective in allowing me to assess mental state
- It was effective for the first assessment (first meeting with patient)
- It was effective for follow up reviews (subsequent meetings with patient)
- It was easy to involve other people (eg carers or other professionals) if needed
- It felt like a safe process
- It was technically straightforward
- It felt like a sensitive means to pick up fluctuations in mental state
- None of the above
- Other

9/27/22, 6:05 PM

Survey of clinicians experience of digital appointments

16. Please indicate what has contributed negatively to your experience in delivering telephone consultations (please tick all that apply) \*

- It was difficult to establish rapport
- I did not feel confident about delivering this type of consultation
- I did not feel supported in delivering this type of consultation
- I was not confident about confidentiality
- It was difficult to talk about sensitive topics
- It was ineffective in allowing me to assess risk
- It was ineffective in allowing me to assess mental state
- It was ineffective for the first assessment (first meeting with patient)
- It was ineffective for follow up reviews (subsequent meetings with patient)
- It was difficult to involve other people (eg carers or other professionals) if needed
- It felt like an unsafe process
- There were technical difficulties
- It did not feel like a sensitive means to pick up fluctuations in mental state
- None of the above
- Other

17. Do you think that your ability in using telephone consultations effectively has changed since March 2020? \*

- Improved
- Got worse
- Stayed the same
- I have not used telephone consultations more than once

9/27/22, 6:05 PM

Survey of clinicians experience of digital appointments

18. In general, how would you describe your experience with video consultations for delivering mental health care? \*

- Excellent
- Good
- Fair
- Poor
- Very Poor
- N/A (I have not used video consultations)

9/27/22, 6:05 PM

Survey of clinicians experience of digital appointments

19. Please indicate what has contributed positively to your experience in delivering video consultations (please tick all that apply) \*

- It was easy to establish rapport
- I felt confident about delivering this type of consultation
- I felt supported in delivering this type of consultation
- I was confident about confidentiality
- It was easy to talk about sensitive topics
- It was effective in allowing me to assess risk
- It was effective in allowing me to assess mental state
- It was effective for the first assessment (first meeting with patient)
- It was effective for follow up reviews (subsequent meetings with patient)
- It was easy to involve other people (eg carers or other professionals) if needed
- It felt like a safe process
- It was technically straightforward
- It felt like a sensitive means to pick up fluctuations in mental state
- None of the above
- Other



9/27/22, 6:05 PM

Survey of clinicians experience of digital appointments

20. Please indicate what has contributed negatively to your experience in delivering video consultations (please tick all that apply) \*

- It was difficult to establish rapport
- I did not feel confident about delivering this type of consultation
- I did not feel supported in delivering this type of consultation
- I was not confident about confidentiality
- It was difficult to talk about sensitive topics
- It was ineffective in allowing me to assess risk
- It was ineffective in allowing me to assess mental state
- It was ineffective for the first assessment (first meeting with patient)
- It was ineffective for follow up reviews (subsequent meetings with patient)
- It was difficult to involve other people (eg carers or other professionals) if needed
- It felt like an unsafe process
- There were technical difficulties
- It did not feel like a sensitive means to pick up fluctuations in mental state
- None of the above
- Other

21. Do you think that your ability in using video consultations effectively has changed since March 2020? \*

- Improved
- Got worse
- Stayed the same
- I have not used video consultations more than once

9/27/22, 6:05 PM

Survey of clinicians experience of digital appointments

22. How much would you want to include telephone or video consultations in delivering mental healthcare in the future (after COVID-19 restrictions are lifted) \*

- Not at all
- Less than half (but more than none)
- About half
- More than half (but less than all)
- All (I would like all consultations to be via telephone or video)

9/27/22, 6:05 PM

Survey of clinicians experience of digital appointments

### Part 3: Training delivery preferences

23. Have you undertaken any specific training in telepsychiatry? \*

- Yes
- No

24. How would you rate the importance of specific training in telepsychiatry? \*

- Extremely important
- Very important
- Quite important
- Slightly important
- Not important

25. If you were offered training in telepsychiatry which of the following areas (or skills) would you consider it important to focus on? (please tick all that apply) \*

- Using telepsychiatry to complete initial assessments
- Using telepsychiatry to complete follow up assessments /reviews
- Forming a therapeutic relationship when using telepsychiatry
- Assessing mental state when using telepsychiatry
- Assessing risk when using telepsychiatry'
- None of the above

9/27/22, 6:05 PM

Survey of clinicians experience of digital appointments

This content is neither created nor endorsed by Microsoft. The data you submit will be sent to the form owner.

 Microsoft Forms

## **Sondaggio per Utenti del Servizio \_ Progetto Telemachus (italiano)**

Questo sondaggio è destinato alle persone che utilizzano i Servizi di Salute Mentale. Vogliamo conoscere le tue opinioni e le tue esperienze riguardo agli appuntamenti telefonici o mediante video che hai effettuato con la tua équipe curante. Le tue risposte ci forniranno un prezioso riscontro sulle esperienze degli utenti dei Servizi di Salute Mentale e sulle preferenze in merito a come erogare i servizi in futuro.

Grazie per aver partecipato.

\*Obbligatorio

### **Parte 1: Dettagli su di te**

#### **1. Da quale Servizio per La Salute Mentale sei attualmente seguito? \***

- Milano e provincia/Lodi e provincia
- Verona e provincia
- Altro

#### **2. Quale servizio di Milano e provincia/Lodi e provincia ti sta supportando per la tua salute mentale?**

(Se più di un Servizio, quale hai visto di più nell'ultimo anno?) \*

- Salute mentale degli adulti
- Servizi di salute mentale per l'infanzia e l'adolescenza (Neuropsichiatria Infantile) compresi i servizi ospedalieri
- Altro
- Preferirei non rispondere

#### **3. Quale servizio di Verona e provincia ti sta supportando per la tua salute mentale?**

(Se più di un Servizio quale hai visto di più nell'ultimo anno?) \*

- Salute mentale degli adulti

- Servizi di salute mentale per l'infanzia e l'adolescenza (Neuropsichiatria Infantile) compresi i servizi ospedalieri
- Altro
- Preferirei non rispondere

#### **4. Quale servizio ti sta supportando per la tua salute mentale?**

(Se più di un Servizio quale hai visto di più nell'ultimo anno?)

- Salute mentale degli adulti
- Servizi di salute mentale per l'infanzia e l'adolescenza (Neuropsichiatria Infantile) compresi i servizi ospedalieri
- Altro
- Preferirei non rispondere

#### **5. In quale fascia d'età sei? \***

- 16-17
- 18-24
- 25-34
- 35-44
- 45-54
- 55-64
- 65-74
- 75+
- Preferirei non rispondere

#### **6. Qual è il tuo sesso? \***

- Maschio
- Femmina
- Non binario
- Preferirei non rispondere
- Altro

## 7. Qual è la tua etnia?

- Asiatica/ Asiatica Italiana (Cinese)
- Nera / Nera Italiana (Africana)
- Ispanica / Ispanica Italiana (Centro e Sud America)
- Caucasica (Italiana / Est Europa)
- Mista, Caucasica-Asiatica (Cinese)
- Mista, Caucasica-Nera (Africana)
- Mista, Caucasica-Ispanica (Centro e Sud America)
- Altra Asiatica
- Altra Nera
- Altra Caucasica
- Altra Mista
- Altra
- Preferirei non rispondere

## 8. Quale pensi sia il tuo principale problema di salute mentale? \*

- Disturbo dell'umore (come depressione o disturbo affettivo bipolare)
- Disturbo d'ansia (come il disturbo di panico)
- Disturbo post traumatico da stress
- Disturbo ossessivo-compulsivo
- Disturbo Psicotico (come Schizofrenia o Disturbo Schizoaffettivo)
- Disturbo da uso di alcol
- Disturbo da uso di sostanze (escluso l'alcol)
- Disturbo di personalità (come il disturbo di personalità emotivamente instabile)
- Problemi di memoria
- ADHD (Disturbo da deficit di attenzione e iperattività)
- Disturbi alimentari (come anoressia o bulimia nervosa)
- Preferirei non rispondere
- Altro

## **Parte 2: Uso di appuntamenti telefonici e video per la cura della tua salute mentale da marzo 2020**

La tua équipe curante comprende tutto il personale che fornisce assistenza e trattamento per la tua salute mentale. Questa potrebbe includere un case manager, un terapeuta occupazionale, un infermiere psichiatrico, un assistente sociale, un medico psichiatra o uno psicologo.

La maggior parte degli appuntamenti video ha avuto luogo utilizzando piattaforme quali Zoom, Meet, Teams o Skype.

### **9. All'incirca quanti appuntamenti telefonici o video hai avuto con la tua équipe curante da marzo 2020? \***

- Nessuna
- 1
- 2-5
- 6-10
- Più di 10

### **10. C'è stato un cambiamento nell'utilizzo degli appuntamenti telefonici o video nella tua assistenza sanitaria mentale da marzo 2020? \***

- Il telefono o il video sono stati usati più spesso
- Il telefono o il video sono stati usati meno spesso
- Nessun cambiamento
- Non ho avuto assistenza per la mia salute mentale prima di marzo 2020

### **11. Come è stato più spesso scelto il tipo di appuntamento che hai avuto? \***

Si prega di selezionare un'opzione

- Per mia scelta (e/o del mio care-giver, cioè della persona che più si prende cura di me)
- Per scelta dell'équipe
- La decisione è stata presa congiuntamente da me, dal mio care-giver e dall'équipe



**12. Quale tipologia di appuntamento ritieni sia migliore per te? \***

Trascina e rilascia le opzioni in modo che il preferito sia in alto e il meno preferito in basso

- Di persona con copertura del viso (es. mascherina e/o visiera)
- Di persona senza copertura per il viso
- Telefono
- Video

**13. In generale, come descriveresti la tua esperienza con gli appuntamenti telefonici ricevuti per la tua salute mentale? \***

- Eccellente
- Buona
- Discreta
- Sufficiente
- Insufficiente
- Non ho avuto appuntamenti telefonici

**14. Cosa c'è stato di positivo nella tua esperienza con gli appuntamenti telefonici? \***

(spuntare tutte le risposte pertinenti)

- Mi sono sentito capito/a
- È stato facile capire cosa mi veniva detto
- È stato facile sentire cosa mi veniva detto
- Era comodo/conveniente
- Mi sono trovato/a bene
- Ero fiducioso/a sulla riservatezza
- È stato facile costruire una relazione con l'operatore/i della salute mentale
- È stato facile parlare di argomenti delicati
- È stato facile coinvolgere il mio care-giver e gli altri, se necessario
- Sentivo che c'era abbastanza tempo
- Mi sentivo al sicuro/a
- Era facile da usare (tecnicamente)

**15. Cosa c'è stato di negativo nella tua esperienza con gli appuntamenti telefonici? \***

Seleziona tutte le risposte pertinenti

- Mi sono sentito/a meno compreso/a
- Era difficile capire cosa mi veniva detto
- Era difficile sentire cosa mi veniva detto
- Era meno comodo/conveniente
- Mi sentivo meno a mio agio
- Non ero sicuro/a della riservatezza
- È stato difficile costruire una relazione con l'operatore/i della salute mentale
- Era difficile parlare di argomenti delicati
- È stato difficile coinvolgere il mio care-giver e gli altri se necessario
- Sentivo che c'era troppo poco tempo
- Non mi sentivo al sicuro/a
- Era difficile da usare (tecnicamente)

**16. In generale, come descriveresti la tua esperienza con gli appuntamenti video per la tua assistenza per la salute mentale? \***

- Eccellente
- Buona
- Discreta
- Sufficiente
- Insufficiente
- Non ho avuto video appuntamenti

**17. Cosa c'è stato di positivo nella tua esperienza con gli appuntamenti video? \***

(spuntare tutte le risposte pertinenti)

- Mi sono sentito capito/a
- È stato facile capire cosa mi veniva detto
- È stato facile sentire cosa mi veniva detto

- Era comodo/conveniente
- Mi sono trovato/a bene
- Ero fiducioso/a sulla riservatezza
- È stato facile costruire una relazione con l'operatore/i della salute mentale
- È stato facile parlare di argomenti delicati
- È stato facile coinvolgere il mio care-giver e gli altri, se necessario
- Sentivo che c'era abbastanza tempo
- Mi sentivo al sicuro
- Era facile da usare (tecnicamente)

**18. Cosa c'è stato di negativo nella tua esperienza con gli appuntamenti video? \***

Seleziona tutte le risposte pertinenti

- Mi sono sentito/a meno compreso/a
- Era difficile capire cosa mi veniva detto
- Era difficile sentire cosa mi veniva detto
- Era meno comodo/conveniente
- Mi sentivo meno a mio agio
- Non ero sicuro della riservatezza
- È stato difficile costruire una relazione con l'operatore/i della salute mentale
- Era difficile parlare di argomenti delicati
- È stato difficile coinvolgere il mio care-giver e gli altri se necessario
- Sentivo che c'era troppo poco tempo
- Non mi sentivo al sicuro/a
- Era difficile da usare (tecnicamente)

**19. Come è cambiata nel tempo la tua esperienza con gli appuntamenti telefonici o video? \***

- È migliorata
- È peggiorata
- È rimasta la stessa
- Non ho avuto più di una consulenza telefonica o video

**20. Quanto vorresti avere appuntamenti telefonici o video in futuro? \***

Ad esempio, dopo la revoca delle restrizioni relative al COVID-19

- Affatto
- Meno della metà di tutti gli appuntamenti (ma più di nessuno)
- Circa metà
- Più della metà (ma meno di tutti)
- Tutti (vorrei che tutti gli appuntamenti fossero via telefono o video)

**21. Hai avuto una formazione su come avere un appuntamento telefonico o video? \***

- Sì
- No

**22. Vorresti una formazione su come avere appuntamenti telefonici o video? \***

- Decisamente
- Probabilmente
- Può essere
- Assolutamente no

### **Sondaggio per Familiari \_ Telemachus (Italiano)**

Questo sondaggio è destinato a coloro che si prendono cura di persone (di tutte le età) che utilizzano i Servizi per la Salute Mentale. Vogliamo conoscere le tue opinioni e le tue esperienze rispetto agli appuntamenti da remoto (ad es. telefono o video). Le tue risposte ci forniranno un prezioso riscontro sulle esperienze degli utenti dei Servizi di Salute Mentale e sulle preferenze in merito a come erogare i servizi in futuro.

Grazie per aver partecipato.

\* Obbligatorio

#### **Parte 1: Dettagli sulla persona di cui ti prendi cura**

**1. Quale Servizio per la Salute Mentale sta attualmente supportando la persona di cui ti prendi cura? \***

- Milano e provincia/Lodi e provincia
- Verona e provincia
- Altro

**2. Quale servizio per la Salute Mentale di Milano provincia/Lodi e provincia sta supportando la persona di cui ti prendi cura?**

(Se più di un servizio, quale hai visto di più nell'ultimo anno?) \*

- Servizi di salute mentale degli adulti
- Servizi di salute mentale per l'infanzia e l'adolescenza (Neuropsichiatria Infantile) compresi i servizi ospedalieri
- Altro
- Preferirei non rispondere

**3. Quale servizio per la Salute Mentale di Verona e provincia sta supportando la persona di cui ti prendi cura?**

(Se più di un servizio quale hai visto di più nell'ultimo anno?) \*

- Servizi di salute mentale degli adulti
- Servizi di salute mentale per l'infanzia e l'adolescenza (Neuropsichiatria Infantile) compresi i servizi ospedalieri
- Altro
- Preferirei non rispondere

**4. Quale servizio per la Salute Mentale sta supportando la persona di cui ti prendi cura?**

(Se più di un servizio quale hai visto di più nell'ultimo anno?) \*

- Servizi di salute mentale degli adulti
- Servizi di salute mentale per l'infanzia e l'adolescenza (Neuropsichiatria Infantile) compresi i servizi ospedalieri
- Altro
- Preferirei non rispondere

**5. In quale fascia d'età è la persona di cui ti prendi cura? \***

- 12-15
- 16-17
- 18-24
- 25-34
- 35-44
- 45-54
- 55-64
- 65-74
- 75+
- Preferirei non rispondere

**6. Qual è il sesso della persona di cui ti prendi cura? \***

- Maschio
- Femmina
- Non binario
- Preferirei non rispondere
- Altro

#### **7. Qual è l'etnia della persona di cui ti prendi cura?**

- Asiatica/ Asiatica Italiana (Cinese)
- Nera / Nera Italiana (Africana)
- Ispanica / Ispanica Italiana (Centro e Sud America)
- Caucasica (Italiana / Est Europa)
- Mista, Caucasica-Asiatica (Cinese)
- Mista, Caucasica-Nera (Africana)
- Mista, Caucasica-Ispanica (Centro e Sud America)
- Altra Asiatica
- Altra Nera
- Altra Caucasica
- Altra Mista
- Altra
- Preferirei non rispondere

#### **8. Quale diresti che sia il principale problema di salute mentale della persona di cui ti prendi cura?**

\*

- Disturbo dell'umore (come depressione o disturbo affettivo bipolare)
- Disturbo d'ansia (come il disturbo di panico)
- Disturbo post traumatico da stress
- Disturbo ossessivo-compulsivo
- Disturbo Psicotico (come Schizofrenia o Disturbo Schizoaffettivo)
- Disturbo da uso di alcol

- Disturbo da uso di sostanze (escluso l'alcol)
- Disturbo di personalità (come il disturbo di personalità emotivamente instabile)
- Problemi di memoria
- ADHD (Disturbo da deficit di attenzione e iperattività)
- Disturbi alimentari (come anoressia o bulimia nervosa)
- Preferirei non rispondere
- Altro



## **Parte 2: Uso di appuntamenti telefonici e video per l'assistenza alla salute mentale da marzo 2020**

L'èquipe curante comprende tutto il personale che fornisce assistenza e trattamento per la salute mentale. Questa potrebbe includere un case manager, un terapeuta occupazionale, un infermiere psichiatrico, un'assistente sociale, un medico psichiatra o uno psicologo.

La maggior parte degli appuntamenti video ha avuto luogo utilizzando piattaforme quali Zoom, Meet, Teams o Skype.

### **9. La persona di cui ti prendi cura quanti appuntamenti telefonici o video ha avuto all'incirca con l'èquipe curante da marzo 2020? \***

- Nessuna
- 1
- 2-5
- 6-10
- Più di 10

### **10. C'è stato un cambiamento nell'uso degli appuntamenti telefonici o video da marzo 2020? \***

- Il telefono o il video sono stati usati più spesso
- Il telefono o il video sono stati usati meno spesso
- Nessun cambiamento
- La persona di cui mi prendo cura non ha ricevuto assistenza per la salute mentale prima di marzo 2020

### **11. Come è stata più spesso scelta la modalità con cui effettuare l'appuntamento? \***

Si prega di selezionare un'opzione

- È stata una scelta della persona e/o del caregiver
- È stata una scelta dell'èquipe curante
- La decisione è stata presa congiuntamente dalla persona / dal suo care-giver e dall'èquipe

**12. Secondo te quale tipo di appuntamento è migliore in generale? \***

Trascina e rilascia le opzioni in modo che il preferito sia in alto e il meno preferito in basso

- Di persona con copertura del viso (es. mascherina e/o visiera)
- Di persona senza coprirsi il viso
- Telefono
- Video

**13. In generale, come descriveresti la tua esperienza con gli appuntamenti telefonici per l'assistenza per la salute mentale? \***

- Eccellente
- Buona
- Discreta
- Sufficiente
- Insufficiente
- Non ho preso parte ad appuntamenti telefonici

**14. Cosa c'è stato di positivo nella tua esperienza con gli appuntamenti telefonici? \***

(spuntare tutte le risposte pertinenti)

- La persona di cui mi prendo cura si è sentita compresa
- Era facile capire cosa si diceva
- È stato facile sentire quello che veniva detto
- Era comodo/conveniente
- La persona di cui mi prendo cura si è sentita a suo agio
- La persona di cui mi prendo cura si sentiva sicura della riservatezza
- È stato facile costruire una relazione con l'operatore/i di salute mentale
- È stato facile parlare di argomenti delicati
- È stato facile coinvolgere altre persone se necessario
- Sembrava che ci fosse abbastanza tempo
- Mi sentivo al sicuro/a
- Era facile da usare (tecnicamente)

**15. Cosa c'è stato di negativo nella tua esperienza con gli appuntamenti telefonici? \***

Seleziona tutte le risposte pertinenti

- La persona di cui mi prendo cura si è sentita meno compresa
- Era difficile capire cosa si diceva
- Era difficile sentire quello che veniva detto
- Era meno comodo/conveniente
- La persona di cui mi prendo cura si sentiva meno a suo agio
- La persona di cui mi prendo cura non era sicura della riservatezza
- È stato difficile costruire una relazione con l'operatore/i di salute mentale health
- Era difficile parlare di argomenti delicati
- È stato difficile coinvolgere altre persone se necessario
- Sembrava che ci fosse troppo poco tempo
- Non mi sentivo al sicuro/a
- Era difficile da usare (tecnicamente)

**16. In generale, come descriveresti la tua esperienza con gli appuntamenti video per l'assistenza per la salute mentale? \***

- Eccellente
- Buona
- Discreta
- Sufficiente
- Insufficiente
- Non ho preso parte a video appuntamenti

**17. Cosa c'è stato di positivo nella tua esperienza con gli appuntamenti video? \***

(spuntare tutte le risposte pertinenti)

- La persona di cui mi prendo cura si è sentita compresa
- Era facile capire cosa si diceva
- È stato facile sentire quello che veniva detto

- Era comodo/conveniente
- La persona di cui mi prendo cura si è sentita a suo agio
- La persona di cui mi prendo cura si sentiva sicura della riservatezza
- È stato facile costruire una relazione con l'operatore/i di salute mentale
- È stato facile parlare di argomenti delicati
- È stato facile coinvolgere altre persone se necessario
- Sembrava che ci fosse abbastanza tempo
- Mi sentivo al sicuro/a
- Era facile da usare (tecnicamente)

**18. Cosa c'è stato di negativo nella tua esperienza con gli appuntamenti video? \***

Seleziona tutte le risposte pertinenti

- La persona di cui mi prendo cura si è sentita meno compresa
- Era difficile capire cosa si diceva
- Era difficile sentire quello che veniva detto
- Era meno comodo/conveniente
- La persona di cui mi prendo cura si sentiva meno a suo agio
- La persona di cui mi prendo cura non era sicura della riservatezza
- È stato difficile costruire una relazione con l'operatore/i di salute mentale health
- Era difficile parlare di argomenti delicati
- È stato difficile coinvolgere altre persone se necessario
- Sembrava che ci fosse troppo poco tempo
- Non mi sentivo al sicuro/a
- Era difficile da usare (tecnicamente)

**19. Come è cambiata nel tempo la tua esperienza con gli appuntamenti telefonici o video? \***

- È migliorata
- È peggiorata
- È rimasta la stessa
- Non ho avuto più di una consulenza telefonica o video

**20. Quanto vorresti che la persona di cui ti prendi cura avesse appuntamenti telefonici o video in futuro? \***

Ad esempio, dopo la revoca delle restrizioni relative al COVID-19

- Nient'affatto / per nulla
- Meno della metà di tutti gli appuntamenti (ma più di nessuno)
- Circa metà
- Più della metà (ma meno di tutti)
- Tutti (vorrei che tutti gli appuntamenti fossero via telefono o video)

**21. Hai avuto una formazione su come si svolge un appuntamento telefonico o video? \***

- Sì
- No

**22. Vorresti una formazione su come si svolge un appuntamento telefonico o video? \***

- Decisamente
- Probabilmente
- Può essere
- Assolutamente no

## **Sondaggio per Clinici \_ Progetto Telemachus (Italiano)**

Grazie per aver partecipato a questo sondaggio.

Nota: "Telepsichiatria" si riferisce a tutte le consultazioni a distanza inclusi telefono e video consultazioni.

\* Obbligatorio

### **Parte 1: Dettagli su di te**

#### **1. Per quale Servizio per La Salute Mentale stai attualmente lavorando? \***

- Milano e provincia/Lodi e provincia
- Verona e provincia

#### **2. In quale tipo di servizio di Milano e provincia/Lodi e provincia lavori per la maggior parte (più del 50%) del tuo tempo clinico? \***

- Salute Mentale degli adulti
- Servizi di salute mentale per l'infanzia e l'adolescenza (Neuropsichiatria Infantile) inclusi i servizi ospedalieri
- Altro

#### **3. In quale tipo di servizio di Verona e Provincia lavori per la maggioranza (più del 50%) del tuo tempo clinico? \***

- Salute Mentale degli adulti
- Servizi di salute mentale per l'infanzia e l'adolescenza (Neuropsichiatria Infantile) inclusi i servizi ospedalieri
- Altro (SerD)

#### **4. Qual è il tuo background professionale? \***

- Infermiere/a

- Assistente sociale
- Terapista occupazionale
- Medico
- Psicologo/a
- Fisioterapista
- Altro

**5. In quale fascia d'età sei? \***

- 18-24
- 25-34
- 35-44
- 45-54
- 55-64
- 65-74
- 74+
- preferirei non rispondere

**6. Qual è il tuo sesso? \***

- Maschio
- Femmina
- Non binario
- Preferirei non rispondere
- Altro

**7. Qual è la tua etnia?**

- Asiatica/ Asiatica Italiana (Cinese)
- Nera / Nera Italiana (Africana)
- Ispanica / Ispanica Italiana (Centro e Sud America)
- Caucasica (Italiana / Est Europa)

- Mista, Caucasica-Asiatica (Cinese)
- Mista, Caucasica-Nera (Africana)
- Mista, Caucasica-Ispanica (Centro e Sud America)
- Altra Asiatica
- Altra Nera
- Altra Caucasica
- Altra Mista
- Altra
- Preferirei non rispondere



## Parte 2: Utilizzo di consulenze telefoniche o video

### 8. Come è cambiato il tuo uso delle consulenze telefoniche o video dall'inizio del Pandemia di Covid-19 (marzo 2020)? \*

- Uso la telepsichiatria più di prima
- Uso la telepsichiatria come prima
- Uso la telepsichiatria meno di prima

### 9. Si prega di classificare la frequenza d'uso dei seguenti tipi di consultazione, da marzo 2020. \*

Trascina e rilascia le opzioni per classificare: 1 è il più frequente, 3 è il meno frequente

- Di persona
- Telefono
- Video

### 10. In generale, quale dei seguenti fattori è stato più influente sul tipo di consulenza fornita da te, da marzo 2020? (barrare un'opzione) \*

- Paziente/Caregiver
- Équipe clinica (io e il team direttamente coinvolto nella cura del paziente)
- Una decisione congiunta tra l'équipe e il paziente/caregiver
- Disposizioni di Servizio/Azienda (direttiva esterna all'équipe)

### 11. Come classificheresti i seguenti tipi di consulenza nel fornire assistenza sanitaria mentale IN GENERALE? (preferenza massima=1.). \* Si prega di trascinare e rilasciare le opzioni per classificare: 1 è il più preferito a 4 è il meno preferito

- Di persona con copertura per il viso (ad es. maschere/visiere)
- Di persona senza copertura per il viso
- Telefono
- Video

**12. Quali problematiche di salute mentale pensi siano PIÙ adatte per una consulenza al telefono o video? (spuntare tutte le risposte pertinenti) \***

- Disturbi dell'umore (come depressione o disturbo affettivo bipolare)
- Disturbi d'ansia (come il disturbo di panico)
- Disturbo post traumatico da stress
- Disturbo ossessivo-compulsivo
- Disturbi psicotici (come la schizofrenia o il disturbo schizoaffettivo)
- Disturbo da uso di alcol
- Disturbi da uso di sostanze (escluso l'alcol)
- Disturbi di personalità (come il disturbo di personalità emotivamente instabile)
- Problemi di memoria
- ADHD (Disturbo da deficit di attenzione e iperattività)
- Comportamento suicidario o autolesionista
- Comportamento di grave malessere o agitazione
- Altro

**13. Quali problematiche di salute mentale pensi siano MENO adatte per una consulenza al telefono o video? (spuntare tutte le risposte pertinenti) \***

- Disturbi dell'umore (come depressione o disturbo affettivo bipolare)
- Disturbi d'ansia (come il disturbo di panico)
- Disturbo post traumatico da stress
- Disturbo ossessivo-compulsivo
- Disturbi psicotici (come la schizofrenia o il disturbo schizoaffettivo)
- Disturbo da uso di alcol
- Disturbi da uso di sostanze (escluso l'alcol)
- Disturbi di personalità (come il disturbo di personalità emotivamente instabile)
- Problemi di memoria
- ADHD (Disturbo da deficit di attenzione e iperattività)
- Comportamento suicidario o autolesionista
- Comportamento di grave malessere o agitazione
- Altro

**14. In generale, come descriveresti la tua esperienza con le consulenze telefoniche per fornire assistenza per la salute mentale? \***

- Eccellente
- Buona
- Discreta
- Sufficiente
- Insufficiente
- N/A (non ho utilizzato consulenze telefoniche)

**15. Indica cosa ha contribuito positivamente alla tua esperienza di consulenza telefonica (barrare tutte le risposte pertinenti) \***

- È stato facile stabilire un rapporto
- Mi sentivo sicuro/a nel fornire questo tipo di consulenza
- Mi sono sentito supportato/a nel fornire questo tipo di consulenza
- Ero fiducioso/a sulla riservatezza
- È stato facile parlare di argomenti delicati
- È stato efficace nel permettermi di valutare il rischio
- È stato efficace nel permettermi di valutare lo stato mentale
- È stato efficace per una prima valutazione (primo incontro con il paziente)
- È stato efficace per le visite di follow-up (incontri successivi con il paziente)
- È stato facile coinvolgere altre persone (ad es. badanti o altri professionisti) se necessario
- Sembrava un processo sicuro
- Era tecnicamente semplice
- Mi è sembrato un mezzo sensibile per rilevare modifiche del quadro clinico

**16. Indica cosa ha contribuito negativamente alla tua esperienza di consulenza telefonica (barrare tutte le risposte pertinenti) \***

- È stato difficile stabilire un rapporto
- Non mi sentivo sicuro/a nel fornire questo tipo di consulenza

- Non mi sentivo supportato/a nel fornire questo tipo di consulenza
- Non ero sicuro/a della riservatezza
- Era difficile parlare di argomenti delicati
- È stato inefficace nel permettermi di valutare il rischio
- È stato inefficace nel permettermi di valutare lo stato mentale
- È stato inefficace per una prima valutazione (primo incontro con il paziente)
- Era inefficace per le visite di follow-up (incontri successivi con il paziente)
- È stato difficile coinvolgere altre persone (ad es. badanti o altri professionisti) se necessario
- Sembrava un processo pericoloso
- Ci sono state difficoltà tecniche
- Non mi sembrava un mezzo sensibile per rilevare modifiche del quadro clinico

**17. Come ritieni sia cambiata la tua capacità di utilizzare efficacemente le consulenze telefoniche da marzo 2020? \***

- È migliorata
- È peggiorata
- È rimasta la stessa
- Non ho utilizzato le consulenze telefoniche più di una volta

**18. In generale, come descriveresti la tua esperienza con le video consulenze per fornire assistenza per la salute mentale? \***

- Eccellente
- Buona
- Discreta
- Sufficiente
- Insufficiente
- N/A (non ho utilizzato le video consulenze)

**19. Indica cosa ha contribuito positivamente alla tua esperienza di video consulenza (seleziona tutte le risposte pertinenti) \***

- È stato facile stabilire un rapporto
- Mi sentivo sicuro/a nel fornire questo tipo di consulenza
- Mi sono sentito supportato/a nel fornire questo tipo di consulenza
- Ero fiducioso/a sulla riservatezza
- È stato facile parlare di argomenti delicati
- È stato efficace nel permettermi di valutare il rischio
- È stato efficace nel permettermi di valutare lo stato mentale
- È stato efficace per una prima valutazione (primo incontro con il paziente)
- È stato efficace per le visite di follow-up (incontri successivi con il paziente)
- È stato facile coinvolgere altre persone (ad es. badanti o altri professionisti) se necessario
- Sembrava un processo sicuro
- Era tecnicamente semplice
- Mi è sembrato un mezzo sensibile per rilevare modifiche del quadro clinico

**20. Indica cosa ha contribuito negativamente alla tua esperienza di videoconsulenza (seleziona tutte le risposte pertinenti) \***

- È stato difficile stabilire un rapporto
- Non mi sentivo sicuro/a nel fornire questo tipo di consulenza
- Non mi sentivo supportato/a nel fornire questo tipo di consulenza
- Non ero sicuro/a della riservatezza
- Era difficile parlare di argomenti delicati
- È stato inefficace nel permettermi di valutare il rischio
- È stato inefficace nel permettermi di valutare lo stato mentale
- È stato inefficace per una prima valutazione (primo incontro con il paziente)
- Era inefficace per le visite di follow-up (incontri successivi con il paziente)
- È stato difficile coinvolgere altre persone (ad es. badanti o altri professionisti) se necessario
- Sembrava un processo pericoloso
- Ci sono state difficoltà tecniche
- Non mi sembrava un mezzo sensibile per rilevare modifiche del quadro clinico

**21. Come ritieni sia cambiata la tua capacità di utilizzare efficacemente la videoconsulenza da marzo 2020? \***

- È migliorata
- È peggiorata
- È rimasta la stessa
- Non ho utilizzato le videoconsulenze più di una volta

**22. Quanto vorresti includere le consulenze telefoniche o video nell'erogazione dell'assistenza per la salute mentale in futuro (dopo la revoca delle restrizioni COVID-19) \***

- Affatto
- Meno della metà (ma più di nessuno)
- Circa metà
- Più della metà (ma meno di tutti)
- Tutti (vorrei che tutte le consulenze fossero via telefono o video)

### Parte 3: Preferenze di erogazione della formazione

**23. Hai seguito una formazione specifica in telepsichiatria? \***

- Sì
- No

**24. Come giudichi l'importanza di una formazione specifica in telepsichiatria? \***

- Estremamente importante
- Molto importante
- Importante
- Poco importante
- Non importante

**25. Se ti fosse offerta una formazione in telepsichiatria, su quali delle seguenti aree (o abilità) vorresti fosse focalizzata? (spuntare tutte le risposte pertinenti) \***

- Utilizzo della telepsichiatria per completare le valutazioni iniziali
- Utilizzo della telepsichiatria per completare valutazioni/visite di follow-up
- Formare una relazione terapeutica quando si usa la telepsichiatria
- Valutare lo stato mentale quando si usa la telepsichiatria
- Valutare il rischio quando si usa la telepsichiatria
- Nessuno dei precedenti
