# Supplementary material for: Evaluation of telepsychiatry during the COVID-19 pandemic across service users, carers and clinicians: an international mixed-methods study
Source: PubMed Central journal article supplement — BMJ Ment Health. 2023 Aug 11;26(1):e300646. doi: 10.1136/bmjment-2022-300646 (PMC10577786; doi:10.1136/bmjment-2022-300646), 2023-08-11
Supplement: bmjment-2022-300646supp003.pdf [file bmjment-2022-300646supp003.pdf]

|          | UK              | ITALY        |
|----------|-----------------|--------------|
|          | 2021            |              |
| March    | Focus Groups    |              |
| October  | Survey (Site 1) |              |
| December | Survey (Site 2) | Survey       |
|          | 2022            |              |
| May      |                 | Focus Groups |

**Appendix – Chronology of qualitative (focus groups) and quantitative (surveys) methods**
