# Supplementary material for: Evaluation of telepsychiatry during the COVID-19 pandemic across service users, carers and clinicians: an international mixed-methods study
Source: PubMed Central journal article supplement — BMJ Ment Health. 2023 Aug 11;26(1):e300646. doi: 10.1136/bmjment-2022-300646 (PMC10577786; doi:10.1136/bmjment-2022-300646), 2023-08-11
Supplement: bmjment-2022-300646supp004.pdf [file bmjment-2022-300646supp004.pdf]

#### **Supplementary File 4: Examples of questions from topic guide used for focus groups**

- Can you summarize what you think telepsychiatry and digital consultations are and what they can be used for?
- What do you think are the strengths and weaknesses of using digital consultations in clinical practice?
- Are there any people who you feel might benefit (or not benefit) from using this type of consultation?
- Are there any situations when you feel that digital consultations are particularly appropriate (or inappropriate)?
- Can you tell us what you like or do not like about digital consultations?
- Are there any difficulties that might limit access to digital consultations? And what about something that might increase access to them?
- In your opinion, are there any difficulties in communication during digital consultations? Are there any advantages in using this method to communicate?
- Can you think of anything that could be done to improve the way digital consultations are conducted?
- Do you have a preference between face-to-face or digital consultations, and can you tell us why?
