# Supplementary material for: Evaluation of telepsychiatry during the COVID-19 pandemic across service users, carers and clinicians: an international mixed-methods study
Source: PubMed Central journal article supplement — BMJ Ment Health. 2023 Aug 11;26(1):e300646. doi: 10.1136/bmjment-2022-300646 (PMC10577786; doi:10.1136/bmjment-2022-300646), 2023-08-11
Supplement: bmjment-2022-300646supp005.pdf [file bmjment-2022-300646supp005.pdf]

**Supplementary file 5. Demographics of focus group participants.**

Total service users/carers = 17

Total clinicians = 14

| Italy               | Characteristics                             | Patients<br>(N = 5) | Clinicians<br>(N = 6) |
|---------------------|---------------------------------------------|---------------------|-----------------------|
| Clinical setting    | Adult Mental Health                         | 5                   |                       |
|                     | Memory Clinic                               |                     |                       |
|                     | Youth Centre                                |                     | 1                     |
|                     | Other(SPDC) & AMH Adult Mental Health       |                     | 4                     |
|                     | Other(SPDC)                                 |                     | 1                     |
|                     | Not Specified                               |                     |                       |
| Profession          | Doctor                                      |                     | 4                     |
|                     | Nurse                                       |                     | 1                     |
|                     | Psychologist                                |                     | 1                     |
| Years in profession | 1-5                                         |                     | 2                     |
|                     | 6-10                                        |                     | 1                     |
|                     | 11-15                                       |                     | 1                     |
|                     | 15+                                         |                     | 2                     |
| Gender              | female                                      | 3                   | 4                     |
|                     | male                                        | 2                   | 2                     |
| Ethnicity           | White                                       | 4                   | N/A                   |
|                     | Asian, - Indian, Pakistani, Bengali, Others | 1                   |                       |
| Age (years)         | 18-24                                       | 3                   | N/A                   |
|                     | 25-34                                       | 1                   |                       |
|                     | 35-44                                       | 1                   |                       |

| UK                  | Characteristics      | Patients and carers | Clinicians |
|---------------------|----------------------|---------------------|------------|
|                     |                      | (N = 12)            | (N = 8)    |
| Clinical setting    | Adult Mental Health  | 5                   | 8          |
|                     | Memory Clinic        | 4                   |            |
|                     | EIP                  | 1                   |            |
|                     | Other & AMH          | 1                   |            |
|                     | Not Specified        | 1                   |            |
| Years in profession | 1-5                  |                     | 3          |
|                     | 6-10                 |                     | 1          |
|                     | 11-15                |                     | 3          |
|                     | 15+                  |                     | 1          |
| Gender              | Female               | 7                   | 7          |
|                     | Male                 | 5                   | 1          |
| Ethnicity           | White British/Irish  | 10                  |            |
|                     | White and Asian      | 1                   |            |
|                     | Asian, Asian British | 1                   |            |
| Age (years)         | 25-34                | 1                   | 5          |
|                     | 35-44                | 1                   | 1          |
|                     | 45-54                | 3                   |            |
|                     | 55-64                | 1                   | 2          |
|                     | 65-74                | 2                   |            |
|                     | 75+                  | 4                   |            |
