# Supplementary material for: Evaluation of telepsychiatry during the COVID-19 pandemic across service users, carers and clinicians: an international mixed-methods study
Source: PubMed Central journal article supplement — BMJ Ment Health. 2023 Aug 11;26(1):e300646. doi: 10.1136/bmjment-2022-300646 (PMC10577786; doi:10.1136/bmjment-2022-300646), 2023-08-11
Supplement: bmjment-2022-300646supp008.pdf [file bmjment-2022-300646supp008.pdf]

**Supplementary file 8.****Positive and negative aspects of telephone consultations, according to service users**

| <b>Positive aspects of telephone consultations</b>                       | <b>Count</b> |
|--------------------------------------------------------------------------|--------------|
| It was convenient                                                        | 402          |
| It was easy to use (technically)                                         | 323          |
| I felt understood                                                        | 254          |
| I felt comfortable                                                       | 236          |
| It was easy to understand what was being said to me                      | 223          |
| I was confident about confidentiality                                    | 198          |
| It felt safe                                                             | 192          |
| It was easy to hear what was being said to me                            | 190          |
| It was easy to talk about sensitive topics                               | 173          |
| I felt that there was enough time                                        | 163          |
| It was easy to build a relationship with the mental health worker/s      | 138          |
| None of the above                                                        | 83           |
| It was easy to involve my carer and others if needed                     | 76           |
| <b>Negative aspects of telephone consultations</b>                       | <b>Count</b> |
| It was difficult to build a relationship with the mental health worker/s | 310          |
| It was difficult to talk about sensitive topics                          | 249          |
| I felt less comfortable                                                  | 215          |
| I felt that there was too little time                                    | 193          |
| I felt less understood                                                   | 188          |
| It was difficult to hear what was being said to me                       | 133          |
| It was difficult to understand what was being said to me                 | 132          |
| I was not confident about confidentiality                                | 129          |
| None of the above                                                        | 124          |
| It was hard to involve my carers and others if needed                    | 100          |
| It was less convenient                                                   | 68           |
| It felt unsafe                                                           | 64           |
| It was difficult to use (technically)                                    | 52           |

**Positive and negative aspects of video consultations, according to service users**

| <b>Positive aspects of video consultations</b>                           | <b>Count</b> |
|--------------------------------------------------------------------------|--------------|
| It was convenient                                                        | 357          |
| I felt understood                                                        | 231          |
| I felt comfortable                                                       | 220          |
| It was easy to use (technically)                                         | 214          |
| It was easy to understand what was being said to me                      | 211          |
| It was easy to hear what was being said to me                            | 181          |
| I felt that there was enough time                                        | 167          |
| It felt safe                                                             | 164          |
| I was confident about confidentiality                                    | 162          |
| It was easy to build a relationship with the mental health worker/s      | 155          |
| It was easy to talk about sensitive topics                               | 152          |
| It was easy to involve my carer and others if needed                     | 112          |
| None of the above                                                        | 53           |
| <b>Negative aspects of video consultations</b>                           | <b>Count</b> |
| It was difficult to build a relationship with the mental health worker/s | 186          |
| It was difficult to talk about sensitive topics                          | 184          |
| I felt less comfortable                                                  | 150          |
| I felt less understood                                                   | 114          |
| It was difficult to hear what was being said to me                       | 112          |
| I was not confident about confidentiality                                | 112          |
| I felt that there was too little time                                    | 112          |
| It was difficult to use (technically)                                    | 104          |
| None of the above                                                        | 83           |
| It was difficult to understand what was being said to me                 | 72           |
| It was hard to involve my carers and others if needed                    | 63           |
| It felt unsafe                                                           | 57           |
| It was less convenient                                                   | 49           |
