# Supplementary material for: Evaluation of telepsychiatry during the COVID-19 pandemic across service users, carers and clinicians: an international mixed-methods study
Source: PubMed Central journal article supplement — BMJ Ment Health. 2023 Aug 11;26(1):e300646. doi: 10.1136/bmjment-2022-300646 (PMC10577786; doi:10.1136/bmjment-2022-300646), 2023-08-11
Supplement: bmjment-2022-300646supp009.pdf [file bmjment-2022-300646supp009.pdf]

**Supplementary file 9.****Positive and negative aspects of telephone consultations, according to clinicians**

| <b>Positive aspects of telephone consultations</b>                                    | <b>Count</b> |
|---------------------------------------------------------------------------------------|--------------|
| It was technically straightforward                                                    | 322          |
| It was effective for follow up reviews (subsequent meetings with patient)             | 284          |
| I felt confident about delivering this type of consultation                           | 237          |
| It was easy to involve other people (eg carers or other professionals) if needed      | 161          |
| It was easy to establish rapport                                                      | 156          |
| I was confident about confidentiality                                                 | 153          |
| It was easy to talk about sensitive topics                                            | 151          |
| It felt like a safe process                                                           | 149          |
| I felt supported in delivering this type of consultation                              | 133          |
| It was effective for the first assessment (first meeting with patient)                | 124          |
| It was effective in allowing me to assess risk                                        | 96           |
| It was effective in allowing me to assess mental state                                | 82           |
| It felt like a sensitive means to pick up fluctuations in mental state                | 54           |
| None of the above                                                                     | 54           |
| <b>Negative aspects of telephone consultations</b>                                    | <b>Count</b> |
| It did not feel like a sensitive means to pick up fluctuations in mental state        | 254          |
| It was ineffective in allowing me to assess mental state                              | 210          |
| It was ineffective in allowing me to assess risk                                      | 207          |
| It was difficult to establish rapport                                                 | 197          |
| It was ineffective for the first assessment (first meeting with patient)              | 190          |
| It was difficult to talk about sensitive topics                                       | 188          |
| There were technical difficulties                                                     | 147          |
| It was difficult to involve other people (eg carers or other professionals) if needed | 129          |
| I was not confident about confidentiality                                             | 122          |
| It felt like an unsafe process                                                        | 63           |
| I did not feel confident about delivering this type of consultation                   | 57           |
| It was ineffective for follow up reviews (subsequent meetings with patient)           | 53           |
| None of the above                                                                     | 53           |
| I did not feel supported in delivering this type of consultation                      | 35           |

**Positive and negative aspects of video consultations, according to clinicians**

| <b>Positive aspects of video consultations</b>                                        | <b>Count</b> |
|---------------------------------------------------------------------------------------|--------------|
| It was effective for follow up reviews (subsequent meetings with patient)             | 281          |
| It was easy to involve other people (eg carers or other professionals) if needed      | 267          |
| I felt confident about delivering this type of consultation                           | 250          |
| It was easy to establish rapport                                                      | 242          |
| It was effective in allowing me to assess mental state                                | 205          |
| It was effective for the first assessment (first meeting with patient)                | 199          |
| It was easy to talk about sensitive topics                                            | 192          |
| I felt supported in delivering this type of consultation                              | 190          |
| It was effective in allowing me to assess risk                                        | 178          |
| It felt like a safe process                                                           | 172          |
| I was confident about confidentiality                                                 | 168          |
| It was technically straightforward                                                    | 161          |
| It felt like a sensitive means to pick up fluctuations in mental state                | 130          |
| None of the above                                                                     | 43           |
| <b>Negative aspects of video consultations</b>                                        | <b>Count</b> |
| There were technical difficulties                                                     | 297          |
| It was ineffective in allowing me to assess risk                                      | 109          |
| It did not feel like a sensitive means to pick up fluctuations in mental state        | 107          |
| I was not confident about confidentiality                                             | 106          |
| It was difficult to talk about sensitive topics                                       | 101          |
| It was ineffective for the first assessment (first meeting with patient)              | 97           |
| It was difficult to establish rapport                                                 | 94           |
| It was ineffective in allowing me to assess mental state                              | 88           |
| None of the above                                                                     | 63           |
| I did not feel confident about delivering this type of consultation                   | 59           |
| I did not feel supported in delivering this type of consultation                      | 39           |
| It was difficult to involve other people (eg carers or other professionals) if needed | 37           |
| It felt like an unsafe process                                                        | 33           |
| It was ineffective for follow up reviews (subsequent meetings with patient)           | 27           |
